# Supplementary material for: Novel CaO–SiO2–P2O5 Nanobioglass Activated with Hafnium Phthalocyanine
Source: Nanomaterials (Basel). 2022 May 18;12(10):1719. doi: 10.3390/nano12101719 (PMC9146838; doi:10.3390/nano12101719)
Supplement: Supplementary file 1 [file nanomaterials-12-01719-s001.zip › nanomaterials-1699060-Supplementary.pdf]

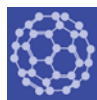

# Novel CaO–SiO<sub>2</sub>–P<sub>2</sub>O<sub>5</sub> Nanobioglass Activated with Hafnium Phthalocyanine

Yuriy Gerasymchuk, Anna Wedzynska and Anna Lukowiak \*

Institute of Low Temperature and Structure Research, PAS, ul Okolna 2, 50-422 Wrocław, Poland;  
y.gerasymchuk@intibs.pl (Y.G.); a.wedzynska@intibs.pl (A.W.)

\* Correspondence: a.lukowiak@intibs.pl

The obtained calcium oxide, which was used as a source of calcium needed in the glass synthesis, was characterized using the X-ray diffraction analysis. The XRD pattern of the powder is shown in Figure S1. The Scherrer equation

$$D = K\lambda/(\beta\cos\theta)$$

(where D is the mean size of the grain size, K is a dimensionless shape factor (0.9),  $\lambda$  is the X-ray wavelength (Cu K $\alpha$ , 1.5406 Å),  $\beta$  is the line broadening at half the maximum intensity (FWHM).  $\theta$  is the Bragg angle), was used to calculate the size of the crystallites showing that the particles had diameter of 40 nm.

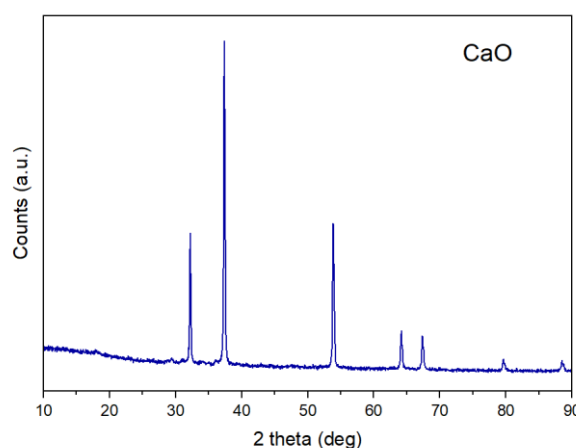

Figure S1. X-ray diffraction pattern of the obtained CaO powder.

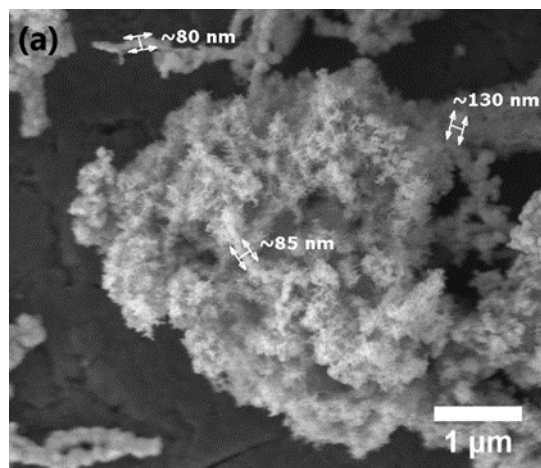

Figure S2. SEM image showing diameters of selected nanoparticles.

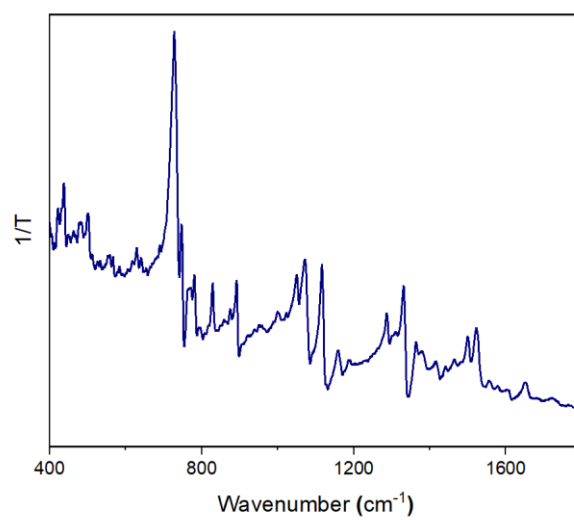

**Figure S3.** IR spectrum of dichlorohafnium(IV) phthalocyanine.
